# Supplementary material for: Diabetes Capabilities for the Healthcare Workforce Identified via a 3-Staged Modified Delphi Technique
Source: MDPI journal article supplement (doi:10.3390/ijerph19021012), 2022-01-17
Supplement: s1 [file s1]

**Table S1: Expert Advisory Group members' characteristics**

| <b>Qualifications and roles</b>                                                                                                                                                                                                                                | <b>Current employer</b>                                                     |
|----------------------------------------------------------------------------------------------------------------------------------------------------------------------------------------------------------------------------------------------------------------|-----------------------------------------------------------------------------|
| PhD, Advanced Practising Dietitian, Consumer and Academic.                                                                                                                                                                                                     | University–Human nutrition                                                  |
| Master in Nursing, Nurse Practitioner, Midwife, CDE.<br>Held roles in academia as course coordinator for diabetes education degrees and leadership roles in Australian Diabetes Educators Association (ADEA) and the Australian Diabetes in Pregnancy Society. | District health service<br>Private practice                                 |
| Senior Clinical Nurse Adviser, CDE<br>Held leadership roles nationally in ADEA.                                                                                                                                                                                | Not-for-profit aged care service and healthcare provider / Private practice |
| PhD, BA(Psych), Post-doctoral Research Fellow and Behavioural Scientist.                                                                                                                                                                                       | University–Behavioural science                                              |
| CDE, BA, Lecturer, unit chair for a graduate certificate of diabetes education and Academic.                                                                                                                                                                   | University–Nursing                                                          |

**Table S2: Characteristics of participants in study**

|                                                      | Pilot and EAG<br>(n=15) |     | Consultation<br>Group<br>(n=15) |     | Delphi 1<br>Round 1<br>(n=50) |    | Delphi 1<br>Round 2<br>(n=44) |    | Delphi 2<br>Round 1<br>(n=40) |    | Delphi 2<br>Round 2<br>(n=37) |     | Focus<br>Group<br>(n=4) |     |
|------------------------------------------------------|-------------------------|-----|---------------------------------|-----|-------------------------------|----|-------------------------------|----|-------------------------------|----|-------------------------------|-----|-------------------------|-----|
| <b>Discipline</b>                                    | <i>n</i>                | %   | <i>n</i>                        | %   | <i>n</i>                      | %  | <i>n</i>                      | %  | <i>n</i>                      | %  | <i>n</i>                      | %   | <i>n</i>                | %   |
| Aboriginal & Torres Strait<br>Islander Health Worker | 0                       | 0   | 0                               | 0   | 0                             | 0  | 0                             | 0  | 0                             | 0  | 0                             | 0   | 0                       | 0   |
| Dietitian                                            | 2                       | 13  | 3                               | 20  | 5                             | 10 | 5                             | 11 | 5                             | 13 | 5                             | 14  | 1                       | 25  |
| Exercise physiologist                                | 0                       | 0   | 0                               | 0   | 1                             | 2  | 1                             | 2  | 1                             | 3  | 1                             | 3   | 0                       | 0   |
| Nurse                                                | 10                      | 67  | 8                               | 53  | 39                            | 78 | 33                            | 75 | 29                            | 73 | 27                            | 73  | 2                       | 50  |
| Physiotherapist                                      | 0                       | 0   | 0                               | 0   | 0                             | 0  | 0                             | 0  | 0                             | 0  | 0                             | 0   | 0                       | 0   |
| Pharmacist                                           | 0                       | 0   | 4                               | 27  | 2                             | 4  | 2                             | 5  | 2                             | 5  | 2                             | 5   | 1                       | 25  |
| Podiatrist                                           | 1                       | 7   | 0                               | 0   | 2                             | 4  | 2                             | 5  | 2                             | 5  | 2                             | 5   | 0                       | 0   |
| Psychologist/Behavioural                             | 2                       | 13  | 0                               | 0   | 1                             | 2  | 1                             | 2  | 1                             | 3  | 0                             | 0   | 0                       | 0   |
| <b>Gender</b>                                        | <i>n</i>                | %   | <i>n</i>                        | %   | <i>n</i>                      | %  | <i>n</i>                      | %  | <i>n</i>                      | %  | <i>n</i>                      | %   | <i>n</i>                | %   |
| Female                                               | 15                      | 100 | 14                              | 93  | 49                            | 98 | 43                            | 98 | 39                            | 97 | 37                            | 100 | 4                       | 100 |
| Male                                                 | 0                       | 0   | 1                               | 7   | 1                             | 2  | 1                             | 2  | 1                             | 3  | 0                             | 0   | 0                       | 0   |
| <b>Years of practice</b>                             | <i>n</i>                | %   | <i>n</i>                        | %   | <i>n</i>                      | %  | <i>n</i>                      | %  | <i>n</i>                      | %  | <i>n</i>                      | %   | <i>n</i>                | %   |
| > 5 - 10 years                                       | 0                       | 0   | 0                               | 0   | 4                             | 8  | 4                             | 9  | 4                             | 10 | 4                             | 11  | 0                       | 0   |
| >10 - 15 years                                       | 2                       | 13  | 3                               | 20  | 2                             | 4  | 2                             | 5  | 2                             | 5  | 2                             | 5   | 0                       | 0   |
| > 15 - 20 years                                      | 0                       | 0   | 0                               | 0   | 8                             | 16 | 8                             | 18 | 8                             | 20 | 6                             | 16  | 0                       | 0   |
| > 20 years                                           | 6                       | 40  | 2                               | 13  | 6                             | 12 | 4                             | 9  | 3                             | 8  | 4                             | 11  | 2                       | 50  |
| > 30 years                                           | 7                       | 47  | 10                              | 67  | 30                            | 60 | 26                            | 59 | 23                            | 58 | 21                            | 57  | 2                       | 50  |
| <b>State/territory of practice</b>                   | <i>n</i>                | %   | <i>n</i>                        | %   | <i>n</i>                      | %  | <i>n</i>                      | %  | <i>n</i>                      | %  | <i>n</i>                      | %   | <i>n</i>                | %   |
| ACT / NSW                                            | 3                       | 20  | 3                               | 20  | 14                            | 28 | 11                            | 25 | 10                            | 25 | 7                             | 19  | 1                       | 25  |
| Northern Territory                                   | 0                       | 0   | 1                               | 7   | 2                             | 4  | 2                             | 5  | 2                             | 5  | 2                             | 5   | 0                       | 0   |
| Queensland                                           | 0                       | 0   | 1                               | 7   | 6                             | 12 | 6                             | 14 | 6                             | 15 | 6                             | 16  | 1                       | 25  |
| South Australia                                      | 0                       | 0   | 3                               | 20  | 4                             | 8  | 4                             | 9  | 3                             | 8  | 2                             | 5   | 1                       | 25  |
| Tasmania                                             | 4                       | 27  | 1                               | 7   | 3                             | 6  | 3                             | 7  | 3                             | 8  | 2                             | 5   | 0                       | 0   |
| Victoria                                             | 8                       | 53  | 4                               | 27  | 15                            | 30 | 13                            | 30 | 11                            | 28 | 12                            | 32  | 1                       | 25  |
| Western Australia                                    | 0                       | 0   | 2                               | 13  | 6                             | 12 | 5                             | 11 | 5                             | 13 | 6                             | 16  | 0                       | 0   |
| <b>Employment locality (all)</b>                     | <i>n</i>                | %   | <i>n</i>                        | %   | <i>n</i>                      | %  | <i>n</i>                      | %  | <i>n</i>                      | %  | <i>n</i>                      | %   | <i>n</i>                | %   |
| RA1 – Major cities                                   | 3                       | 20  |                                 | 33  |                               | 32 |                               |    |                               | 31 |                               |     | 2                       | 50  |
| RA2 – Inner regional                                 | 4                       | 27  |                                 | 20  |                               | 27 |                               |    |                               | 28 |                               |     |                         |     |
| RA3 – Outer regional                                 | 6                       | 40  |                                 | 27  |                               | 19 |                               |    |                               | 19 |                               |     | 2                       | 50  |
| RA4 – Remote                                         | 2                       | 13  |                                 | 13  |                               | 12 |                               |    |                               | 11 |                               |     |                         |     |
| RA5 – Very remote                                    | 0                       | 0   |                                 | 7   |                               | 10 |                               |    |                               | 11 |                               |     |                         |     |
| <b>Age group</b>                                     | <i>n</i>                | %   | <i>n</i>                        | %   | <i>n</i>                      | %  | <i>n</i>                      | %  | <i>n</i>                      | %  | <i>n</i>                      | %   | <i>n</i>                | %   |
| < 30 years                                           | 2                       | 13  | 0                               | 0   | 1                             | 2  | 1                             | 2  | 1                             | 3  | 1                             | 3   | 0                       | 0   |
| > 30 - 50 years                                      | 9                       | 60  | 4                               | 27  | 14                            | 28 | 11                            | 25 | 10                            | 25 | 9                             | 24  | 1                       | 25  |
| > 50 years                                           | 4                       | 27  | 11                              | 73  | 35                            | 70 | 32                            | 73 | 29                            | 73 | 27                            | 73  | 3                       | 75  |
| <b>Employment sector</b>                             | <i>n</i>                | %   | <i>n</i>                        | %   | <i>n</i>                      | %  | <i>n</i>                      | %  | <i>n</i>                      | %  | <i>n</i>                      | %   | <i>n</i>                | %   |
| Primary (including community)                        | 2                       | 13  |                                 | 25  |                               | 25 |                               |    |                               | 28 |                               |     | 1                       | 25  |
| Tertiary/Hospital (inc out-pts)                      | 5                       | 34  |                                 | 52  |                               | 47 |                               |    |                               | 54 |                               |     | 2                       | 50  |
| Research/University                                  | 6                       | 40  |                                 | 15  |                               | 18 |                               |    |                               | 13 |                               |     | 0                       | 0   |
| Private practice                                     | 2                       | 13  |                                 | 8   |                               | 10 |                               |    |                               | 5  |                               |     | 1                       | 25  |
| <b>Highest qualification</b>                         | <i>n</i>                | %   | <i>n</i>                        | %   | <i>n</i>                      | %  | <i>n</i>                      | %  | <i>n</i>                      | %  | <i>n</i>                      | %   | <i>n</i>                | %   |
| General nurse training (Hosp)                        | 0                       | 0   | 0                               | 0   | 2                             | 4  |                               |    | 1                             | 3  |                               |     | 0                       | 0   |
| Bachelor's degree                                    | 0                       | 0   | 0                               | 0   | 3                             | 6  |                               |    | 1                             | 3  |                               |     | 0                       | 0   |
| Postgraduate Degree                                  | 6                       | 40  | 11                              | 73  | 29                            | 58 |                               |    | 25                            | 63 |                               |     | 3                       | 75  |
| Clinical Masters                                     | 2                       | 13  | 1                               | 7   | 10                            | 20 |                               |    | 7                             | 18 |                               |     | 0                       | 0   |
| Masters (Research)                                   | 1                       | 7   | 3                               | 20  | 4                             | 8  |                               |    | 4                             | 10 |                               |     | 1                       | 25  |
| PhD or Doctorate                                     | 6                       | 40  | 0                               | 0   | 2                             | 4  |                               |    | 2                             | 5  |                               |     | 0                       | 0   |
| <b>Degree in diabetes</b>                            |                         |     | <i>n</i>                        | %   | <i>n</i>                      | %  |                               |    |                               |    |                               |     | <i>n</i>                | %   |
| Yes postgrad                                         |                         |     | 15                              | 100 | 42                            | 84 |                               |    |                               |    |                               |     | 3                       | 75  |
| <b>Involved with medicines</b>                       |                         |     |                                 |     | <i>n</i>                      | %  |                               |    |                               |    |                               |     | <i>n</i>                | %   |
| Yes                                                  |                         |     |                                 |     | 39                            | 78 |                               |    |                               |    |                               |     | 3                       | 75  |
| Maybe                                                |                         |     |                                 |     | 5                             | 10 |                               |    |                               |    |                               |     | 1                       | 25  |
| No                                                   |                         |     |                                 |     | 6                             | 12 |                               |    |                               |    |                               |     | 0                       | 0   |

**Figure S1: Delphi survey response rate**

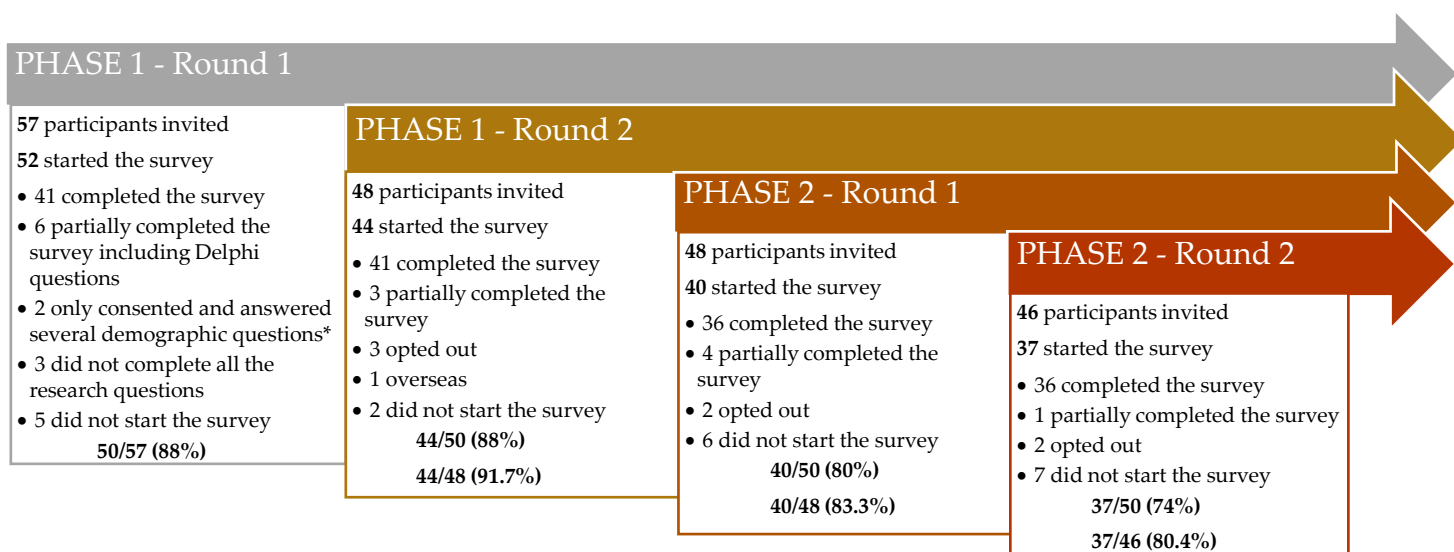

**Table S3: Ranking of practice level models by Delphi participants**

| Framework | Rank No. 1 |     | Rank No. 2 |     | Rank No. 3 |     | Rank No. 4 |     |      |        |     | Total |
|-----------|------------|-----|------------|-----|------------|-----|------------|-----|------|--------|-----|-------|
|           | %          | No. | %          | No. | %          | No. | %          | No. | Mean | Medium | MAD | No.   |
| Model 1   | 32.6%      | 14  | 23.3%      | 10  | 16.3%      | 7   | 27.9%      | 12  | 2.40 | 2      | 1.0 | 43    |
| Model 2   | 30.2%      | 13  | 20.9%      | 9   | 34.9%      | 15  | 14.0%      | 6   | 2.33 | 2      | 0.9 | 43    |
| Model 3   | 30.2%      | 13  | 48.8%      | 21  | 16.3%      | 7   | 4.7%       | 2   | 1.95 | 2      | 0.6 | 43    |
| Model 4   | 7.0%       | 3   | 7.0%       | 3   | 32.6%      | 14  | 53.5%      | 23  | 3.33 | 4      | 0.7 | 43    |

NB: One participant answered all the questions but did not fully complete the ranking; therefore, this individual's responses were not included.

**Figure S2: Model 3 Multidisciplinary**

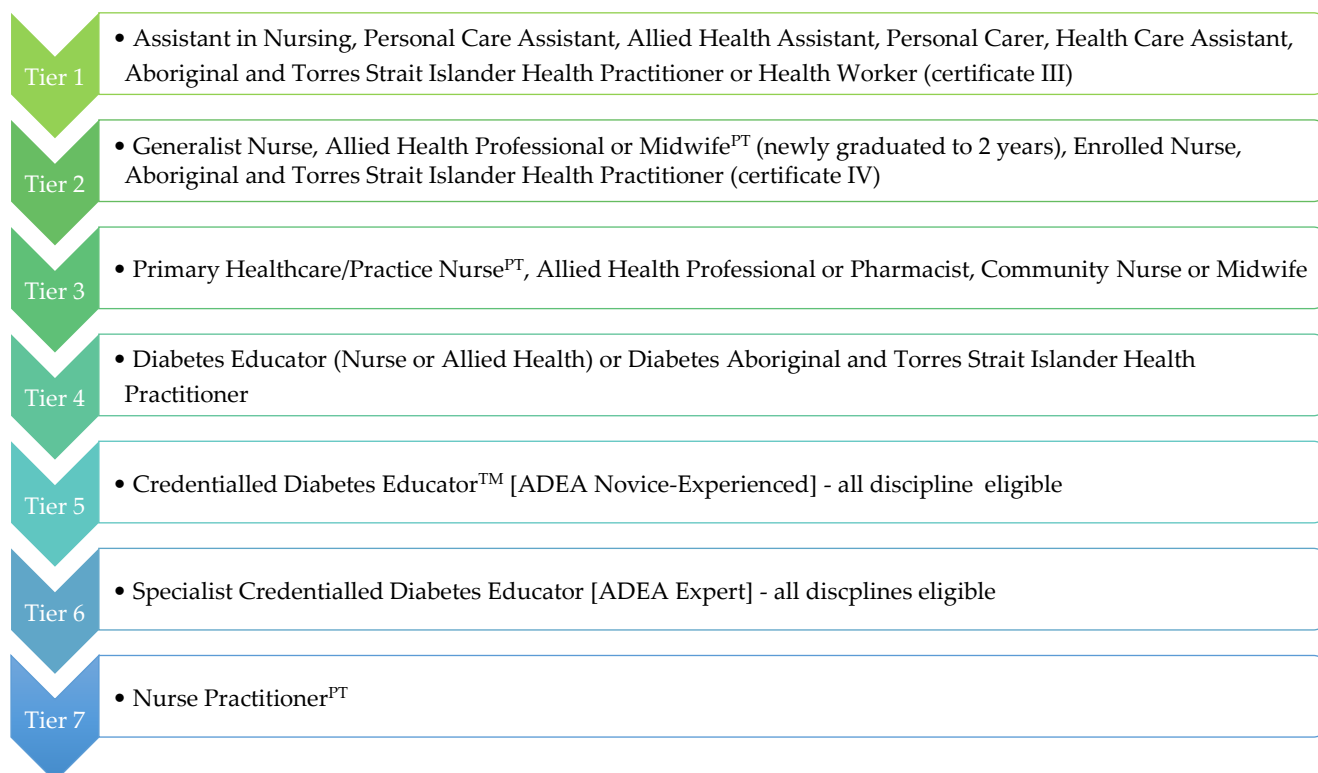

NB: Advanced Management Credentialed Diabetes Educator with non-medical prescriber endorsement recommended and was presented in practice level 7. Removed on advice that the role does not currently exist and could more likely sit in practice level 6 dependent on scope and training.

---

**Table S4: Stages of diabetes clinical competence associated with practice levels**

---

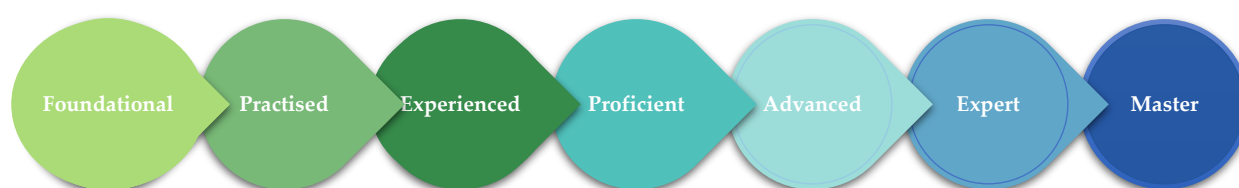

---

**Foundational level (Practice level 1):** the healthcare provider who works at a foundational level provides care to a wide variety of consumers with a broad range of medical conditions. They have some basic knowledge and skills to support diabetes care under direction and close supervision within routine tasks and procedures.

---

**Practised level (Practice level 2):** the healthcare provider who works at a practised level provides care to varied consumer groups and a broad range of conditions. The generalist healthcare provider with a broad scope of practice is involved in aspects of diabetes care and has basic diabetes care skills.

---

**Experienced level (Practice level 3):** the healthcare provider who works at an experienced level provides care to a broad consumer group who have complex healthcare needs and a broad range of conditions. The experienced generalist healthcare provider has gained more focused involvement to aspects of diabetes care and has started or needs to work towards developing competencies in diabetes over several years.

---

**Proficient level (Practice level 4):** the healthcare provider who works at a proficient level provides diabetes care to a varied consumer group with a limited range of medical conditions, primarily diabetes. Their scope of practice is narrowing, and they use advanced skills to promote shared decision-making with people living with diabetes.

---

**Advanced level (Practice level 5):** the healthcare provider who works at an advanced level has advanced competencies in diabetes care. They extend and develop their competence through mentoring and extensive experience in the speciality area of diabetes. Their scope of practice is focused on diabetes with a varied and broad diabetes consumer group.

---

**Expert level (Practice level 6):** the advanced practice healthcare provider who works at an expert level to provide care to a specific diabetes consumer group, e.g. paediatrics or pregnancy. The healthcare provider functions at a high advanced practice level and focuses on a speciality area in diabetes. Their scope of practice and diabetes consumer group are narrow, and may include non-medical prescribing skills.

---

**Master level (Practice level 7):** the Master healthcare provider uses intuitive reflectivity in complex care and has mastered many health and diabetes care elements. They have a broad set of highly advanced practice assessment and clinical skills to complement a narrow scope of practice. They identify and utilise expertise for specific complex consumer cases and work within a defined scope of practice and consumer group.

---

---

**Table S5: Attributes required that underpin capabilities**

---

| <b>Attributes to support excellent communication, collaboration and advocacy</b>                                                                                                                                                                                                                                           | <b>Attributes to strive for excellence</b>                                                                                                                                                                                                                                                                                                                                     | <b>Attributes to ensure the professional's health and wellbeing to enable their adaptability to dynamic environments</b>                                         |
|----------------------------------------------------------------------------------------------------------------------------------------------------------------------------------------------------------------------------------------------------------------------------------------------------------------------------|--------------------------------------------------------------------------------------------------------------------------------------------------------------------------------------------------------------------------------------------------------------------------------------------------------------------------------------------------------------------------------|------------------------------------------------------------------------------------------------------------------------------------------------------------------|
| <ul style="list-style-type: none"><li>- active listener</li><li>- caring</li><li>- collaborative</li><li>- compassion</li><li>- cultural competence</li><li>- empathy</li><li>- inclusiveness</li><li>- non-judgemental</li><li>- openness</li><li>- personable</li><li>- willingness to learn from the consumer</li></ul> | <ul style="list-style-type: none"><li>- analytical</li><li>- adaptable</li><li>- accountability</li><li>- confidence</li><li>- commitment</li><li>- creativity</li><li>- ethical</li><li>- honesty</li><li>- initiative</li><li>- inspiring</li><li>- integrity</li><li>- life-long learner</li><li>- open-mindedness</li><li>- professionalism</li><li>- reflective</li></ul> | <ul style="list-style-type: none"><li>- mindfulness</li><li>- self-awareness</li><li>- self-concept</li><li>- self-knowledge</li><li>- self-management</li></ul> |

---

**Table S6: Ranking and central tendencies scores for capability components for practice levels**

The health professional or health assistant will:

| Display clinical assessment capacity                                                                            |        |            |      |          | Round 1 |            |      |          | Round 2 |            |     |          |
|-----------------------------------------------------------------------------------------------------------------|--------|------------|------|----------|---------|------------|------|----------|---------|------------|-----|----------|
| Capability components                                                                                           | Rank % | Mean (Med) | MAD  | Out come | Rank %  | Mean (Med) | MAD  | Out come | Rank %  | Mean (Med) | MAD | Out come |
| <b>PRACTICE LEVEL 1 - FOUNDATIONAL</b>                                                                          |        |            |      |          |         |            |      |          |         |            |     |          |
| Demonstrate foundational clinical measurement skills                                                            | 58     | 3.63(4.0)  | 1.03 | R2       | 81      | 3.97(4.0)  | 0.88 | ✓        |         |            |     |          |
| Support awareness of risk factors for diabetes and its care                                                     | 75     | 3.88(4.0)  | 0.74 | ✓        |         |            |      |          |         |            |     |          |
| <b>PRACTICE LEVEL 2 - PRACTISED</b>                                                                             |        |            |      |          |         |            |      |          |         |            |     |          |
| Demonstrate sound clinical assessment skills                                                                    | 95     | 4.58(5.0)  | 0.53 | ✓        |         |            |      |          |         |            |     |          |
| Assess for diabetes risk factors                                                                                | 87     | 4.32(4.0)  | 0.65 | ✓        |         |            |      |          |         |            |     |          |
| <b>PRACTICE LEVEL 3 – EXPERIENCED</b>                                                                           |        |            |      |          |         |            |      |          |         |            |     |          |
| Demonstrate sound clinical assessment skills                                                                    | 97     | 4.66(5.0)  | 0.47 | ✓        |         |            |      |          |         |            |     |          |
| Display a sound understanding of diabetes risk factors & impact on Aboriginal and Torres Strait Islander people | 95     | 4.66(5.0)  | 0.49 | ✓        |         |            |      |          |         |            |     |          |
| <b>Exemplify clinical assessment capacities</b>                                                                 |        |            |      |          |         |            |      |          |         |            |     |          |
| Capability components                                                                                           | Rank % | Mean (Med) | MAD  | Out come | Rank %  | Mean (Med) | MAD  | Out come | Rank %  | Mean (Med) | MAD | Out come |
| <b>PRACTICE LEVEL 4 – PROFICIENT</b>                                                                            |        |            |      |          |         |            |      |          |         |            |     |          |
| Demonstrate developed advanced clinical assessment skills in diabetes                                           | 92     | 4.61(5.0)  | 0.54 | ✓        |         |            |      |          |         |            |     |          |
| Campaign for early screening and diabetes prevention                                                            | 95     | 4.66(5.0)  | 0.49 | ✓        |         |            |      |          |         |            |     |          |
| <b>PRACTICE LEVEL 5A – ADVANCED</b>                                                                             |        |            |      |          |         |            |      |          |         |            |     |          |
| Demonstrate developed advanced clinical assessment skills in diabetes                                           | 95     | 4.61(5.0)  | 0.52 | ✓        |         |            |      |          |         |            |     |          |
| Campaign for early screening and diabetes prevention                                                            | 97     | 4.66(5.0)  | 0.47 | ✓        |         |            |      |          |         |            |     |          |
| <b>PRACTICE LEVEL 5B – ADVANCED</b>                                                                             |        |            |      |          |         |            |      |          |         |            |     |          |
| Demonstrate proven advanced clinical assessment skills in diabetes                                              | 97     | 4.82(5.0)  | 0.31 | ✓        |         |            |      |          |         |            |     |          |
| Campaign for earlier detection of type 1 diabetes and type 2 diabetes                                           | 92     | 4.63(5.0)  | 0.52 | ✓        |         |            |      |          |         |            |     |          |
| <b>PRACTICE LEVEL 6 – EXPERT</b>                                                                                |        |            |      |          |         |            |      |          |         |            |     |          |
| Illustrate comprehensive assessment skills in their specialty area                                              | 97     | 4.87(5.0)  | 0.24 | ✓        |         |            |      |          |         |            |     |          |
| <b>PRACTICE LEVEL 7 - MASTER</b>                                                                                |        |            |      |          |         |            |      |          |         |            |     |          |
| Perform comprehensive assessments in complex diabetes cases [Proposed advanced practice CDE]                    | 97     | 4.89(5.0)  | 0.19 | ✓        |         |            |      |          |         |            |     |          |
| Adeptly perform comprehensive assessments in complex diabetes cases [Nurse practitioner]                        | 97     | 4.89(5.0)  | 0.19 | ✓        |         |            |      |          |         |            |     |          |
| Demonstrate a high level of clinical proficiency in complex situations [Nurse practitioner]                     | 97     | 4.89(5.0)  | 0.19 | ✓        |         |            |      |          |         |            |     |          |

The health professional or health assistant will:

| Support diabetes self-management education (DSME)                                                 |        |            |      |          | Round 1 |            |      |          | Round 2 |            |     |          |
|---------------------------------------------------------------------------------------------------|--------|------------|------|----------|---------|------------|------|----------|---------|------------|-----|----------|
| Capability components                                                                             | Rank % | Mean (Med) | MAD  | Out come | Rank %  | Mean (Med) | MAD  | Out come | Rank %  | Mean (Med) | MAD | Out come |
| <b>PRACTICE LEVEL 1 - FOUNDATIONAL</b>                                                            |        |            |      |          |         |            |      |          |         |            |     |          |
| Promote foundational diabetes self-management education                                           | 48     | 3.50(3.0)  | 0.83 | R2       | 53      | 3.44(4.0)  | 0.81 | FG-X     |         |            |     |          |
| Encourage early diabetes prevention and screening                                                 | 70     | 3.88(4.0)  | 0.88 | R2       | 53      | 3.42(4.0)  | 1.00 | FG-✓     |         |            |     |          |
| Reinforce Demonstrate awareness of foundational healthy eating and physical activity intervention | 73     | 3.90(4.0)  | 0.75 | R2       | 61      | 3.64(4.0)  | 0.72 | FG-✓*    |         |            |     |          |
| Monitor for hypoglycaemia and hyperglycaemia                                                      | 65     | 3.78(3.8)  | 0.84 | R2       | 81      | 4.00(4.0)  | 0.61 | ✓        |         |            |     |          |
| Describe and support screening for diabetes-related complications                                 | 30     | 2.95(3.0)  | 0.77 | X        |         |            |      |          |         |            |     |          |
| Support care of the person with established cardiovascular disease                                | 38     | 3.05(3.0)  | 0.76 | X        |         |            |      |          |         |            |     |          |

|                                                                                                                                                     |                |            |      |         |                |            |      |         |
|-----------------------------------------------------------------------------------------------------------------------------------------------------|----------------|------------|------|---------|----------------|------------|------|---------|
| Promote Participate in quality diabetes care in residential-aged-care and end-of-life stages                                                        | 60             | 3.73(4.0)  | 0.88 | R2      | 53             | 3.58(4.0)  | 0.88 | FG-✓*   |
| Demonstrate awareness of healthcare needs of people living with an intellectual disability                                                          |                |            |      |         |                |            |      | FG-Add  |
| <b>PRACTICE LEVEL 2 - PRACTISED</b>                                                                                                                 |                |            |      |         |                |            |      |         |
| Demonstrate a sound knowledge of the pathophysiology of diabetes                                                                                    | 63             | 3.79(4.0)  | 0.74 | R2      | 78             | 4.08(4.0)  | 0.56 | ✓       |
| Apply chronic conditions self-management principles and education strategies                                                                        | 74             | 4.03(4.0)  | 0.67 | ✓       |                |            |      |         |
| Support diabetes prevention and early screening                                                                                                     | 76             | 4.11(4.0)  | 0.71 | ✓       |                |            |      |         |
| Reinforce healthy eating and physical activity intervention                                                                                         | 87             | 4.24(4.0)  | 0.56 | ✓       |                |            |      |         |
| Monitor and manage glycaemic emergencies                                                                                                            | 82             | 4.34(5.0)  | 0.80 | ✓       |                |            |      |         |
| Assess for sick day management skills                                                                                                               | 55             | 3.66(4.0)  | 0.96 | R2      | 44             | 3.53(3.0)  | 0.81 | FG*-✓*  |
| Advocate for and support appropriate diabetes care for people undergoing surgical procedures to enable quality in-hospital care                     | 84             | 4.18(4.0)  | 0.64 | ✓       |                |            |      |         |
| Guide screening for diabetes-related complications                                                                                                  | 50             | 3.55(3.5)  | 0.71 | R2      | 47             | 3.42(3.0)  | 0.72 | FG-✓    |
| Promote screening for gestational diabetes mellitus                                                                                                 | 90             | 4.39(4.5)  | 0.61 | ✓       |                |            |      |         |
| Support and advocate for pre-conception care and pregnancy planning in people living with prediabetes or diabetes                                   | 84             | 4.21(4.0)  | 0.62 | ✓       |                |            |      |         |
| Awareness of the impact of both diabetes in pregnancy and of pregnancy on diabetes                                                                  | 84             | 4.24(4.0)  | 0.64 | ✓       |                |            |      |         |
| Engage in antenatal and postnatal care related to a pregnancy complicated by diabetes                                                               | 68             | 3.92(4.0)  | 0.74 | R2      | 70             | 3.83(4.0)  | 0.73 | FG-✓    |
| Assess for healthy growth and development in children and adolescents living with diabetes                                                          | 74             | 3.97(4.0)  | 0.57 | ✓       |                |            |      |         |
| Promote health and wellbeing in children and adolescents living with diabetes                                                                       | 79             | 4.16(4.0)  | 0.62 | ✓       |                |            |      |         |
| Demonstrate awareness of and monitors and educate the person with established cardiovascular disease                                                | 66             | 3.82(4.0)  | 0.77 | R2      | 64             | 3.78(4.0)  | 0.62 | FG-✓    |
| Drive quality Promote improved diabetes care in residential-aged-care and end-of-life stages                                                        | 71             | 4.00(4.0)  | 0.74 | R2      | 67             | 3.86(4.0)  | 0.69 | FG-✓*   |
| <b>PRACTICE LEVEL 3 – EXPERIENCED</b>                                                                                                               |                |            |      |         |                |            |      |         |
| Demonstrate a sound knowledge of the pathophysiology of diabetes                                                                                    | 90             | 4.29(4.0)  | 0.56 | ✓       |                |            |      |         |
| Apply chronic conditions self-management principles and education strategies                                                                        | 97             | 4.53(5.0)  | 0.55 | ✓       |                |            |      |         |
| Apply evidence-based and self-management education, intervention and techniques to improve outcomes for people living with prediabetes and diabetes | 90             | 4.32(4.0)  | 0.65 | ✓       |                |            |      |         |
| Drive early diabetes prevention and screening                                                                                                       | 87             | 4.39(5.0)  | 0.67 | ✓       |                |            |      |         |
| Explain healthy eating and physical activity intervention                                                                                           | 87             | 4.34(5.0)  | 0.69 | ✓       |                |            |      |         |
| Educate about, monitor and manage glycaemic emergencies                                                                                             | 82             | 4.16(4.0)  | 0.71 | ✓       |                |            |      |         |
| Promote sick day self-management skills                                                                                                             | 68             | 3.89(4.0)  | 0.78 | R2      | 78             | 3.96(4.0)  | 0.53 | ✓       |
| Guide screening for diabetes-related complications                                                                                                  | 84             | 4.24(4.0)  | 0.72 | ✓       |                |            |      |         |
| Monitor and educate the person with established cardiovascular disease                                                                              | 84             | 4.08(4.0)  | 0.58 | ✓       |                |            |      |         |
| Drive quality diabetes care in residential-aged-care and end-of-life stages                                                                         | 79             | 4.16(4.0)  | 0.75 | ✓       |                |            |      |         |
| Demonstrate cultural competence and advocate for people of Aboriginal and Torres Strait Islander descent                                            | 97             | 4.71(5.0)  | 0.43 | ✓       |                |            |      |         |
| <b>Shapes DSME, support and care</b>                                                                                                                |                |            |      |         |                |            |      |         |
|                                                                                                                                                     | <b>Round 1</b> |            |      |         | <b>Round 2</b> |            |      |         |
| <b>Capability components</b>                                                                                                                        | Rank %         | Mean (Med) | MAD  | Outcome | Rank %         | Mean (Med) | MAD  | Outcome |
| <b>PRACTICE LEVEL 4 – PROFICIENT</b>                                                                                                                |                |            |      |         |                |            |      |         |
| Demonstrate a thorough understanding of the pathophysiology of main diabetes types                                                                  | 97             | 4.74(5.0)  | 0.40 | ✓       |                |            |      |         |



|                                                                                                                                  |    |           |      |   |
|----------------------------------------------------------------------------------------------------------------------------------|----|-----------|------|---|
| Engage in the advanced application of chronic conditions self-management principles                                              | 97 | 4.71(5.0) | 0.43 | ✓ |
| Identify vulnerable populations and considers the impact of coexisting healthcare conditions                                     | 97 | 4.66(5.0) | 0.47 | ✓ |
| Educate in healthy eating and physical activity intervention                                                                     | 95 | 4.79(5.0) | 0.35 | ✓ |
| Display advanced skills in monitoring and managing glycaemic emergencies                                                         | 95 | 4.68(5.0) | 0.47 | ✓ |
| Display basic sick day management skills                                                                                         | 97 | 4.82(5.0) | 0.31 | ✓ |
| Promote knowledge of and screening for diabetes-related complications                                                            | 97 | 4.79(5.0) | 0.34 | ✓ |
| Promote quality diabetes care in residential-aged-care and end-of-life stages                                                    | 95 | 4.53(5.0) | 0.55 | ✓ |
| Demonstrate an advanced understanding of the importance of managing diabetes in acute care or hospital setting                   | 90 | 4.45(5.0) | 0.67 | ✓ |
| <b>PRACTICE LEVEL 5A – ADVANCED</b>                                                                                              |    |           |      |   |
| Demonstrate an advanced understanding of the pathophysiology of the major diabetes types                                         | 97 | 4.79(5.0) | 0.34 | ✓ |
| Adapt to appropriate chronic condition self-management strategies for presentation                                               | 97 | 4.74(5.0) | 0.40 | ✓ |
| Reduce the impact of diabetes on people from vulnerable groups with competing healthcare conditions                              | 95 | 4.61(5.0) | 0.52 | ✓ |
| Integrate an advanced understanding of healthy eating and physical activity interventions                                        | 97 | 4.74(5.0) | 0.40 | ✓ |
| Provide education in and promote best practice care of people living with diabetes and prediabetes                               | 97 | 4.79(5.0) | 0.34 | ✓ |
| Apply health education skills to improve outcomes for people living with diabetes                                                | 97 | 4.74(5.0) | 0.40 | ✓ |
| Demonstrate advanced skills in monitoring and managing glycaemic emergencies                                                     | 97 | 4.66(5.0) | 0.47 | ✓ |
| Demonstrate advanced sick day management skills                                                                                  | 97 | 4.61(5.0) | 0.50 | ✓ |
| Display advanced understanding of diabetes-related complications and their management                                            | 97 | 4.63(5.0) | 0.48 | ✓ |
| Display advanced understanding of attributes of quality diabetes care in residential-aged-care and end-of-life stages            | 97 | 4.53(5.0) | 0.52 | ✓ |
| Advise of important principles for quality care of people living with diabetes in the in-hospital setting                        | 95 | 4.37(4.0) | 0.57 | ✓ |
| <b>PRACTICE LEVEL 5B – ADVANCED</b>                                                                                              |    |           |      |   |
| Demonstrate a comprehensive understanding of the pathophysiology of all types of diabetes                                        | 97 | 4.82(5.0) | 0.31 | ✓ |
| Promote the use of chronic conditions self-management principles                                                                 | 97 | 4.84(5.0) | 0.27 | ✓ |
| Manage complex diabetes impacted by coexisting conditions in vulnerable groups                                                   | 97 | 4.68(5.0) | 0.45 | ✓ |
| Provide an advanced explanation of healthy eating and physical activity interventions                                            | 97 | 4.76(5.0) | 0.37 | ✓ |
| Provide structured education in and consults on best practice management and care of people living with diabetes and prediabetes | 97 | 4.76(5.0) | 0.37 | ✓ |
| Act as a health education consultant                                                                                             | 95 | 4.55(5.0) | 0.54 | ✓ |
| Consult in monitoring and managing glycaemic emergencies                                                                         | 97 | 4.79(5.0) | 0.34 | ✓ |
| Consult in sick day management                                                                                                   | 97 | 4.84(5.0) | 0.27 | ✓ |
| Act as a consultant for the management of diabetes-related complications                                                         | 95 | 4.74(5.0) | 0.42 | ✓ |
| Act as a consultant for quality diabetes care in residential-aged-care and end-of-life stages                                    | 95 | 4.63(5.0) | 0.50 | ✓ |
| Act as a consultant for managing people living with diabetes in acute or hospital settings                                       | 92 | 4.61(5.0) | 0.54 | ✓ |

|                                                                                                                        |    |           |      |   |  |
|------------------------------------------------------------------------------------------------------------------------|----|-----------|------|---|--|
| <b>PRACTICE LEVEL 6 – EXPERT</b>                                                                                       |    |           |      |   |  |
| Provide education in and promote best practice management and care of people living with diabetes and prediabetes      | 97 | 4.84(5.0) | 0.27 | ✓ |  |
| Demonstrate expertise in diabetes health education to improve outcomes for people living with diabetes                 | 97 | 4.84(5.0) | 0.27 | ✓ |  |
| Expertly monitor and manage glycaemic emergencies                                                                      | 95 | 4.82(5.0) | 0.32 | ✓ |  |
| Develop personalised diabetes care related to healthy eating and, recreational activity and physical activity programs | 95 | 4.82(5.0) | 0.32 | ✓ |  |
| Expertly manage sick days in people living with diabetes                                                               | 95 | 4.84(5.0) | 0.28 | ✓ |  |
| Expertly screen or direct screening for diabetes-related complications                                                 | 92 | 4.71(5.0) | 0.46 | ✓ |  |
| Expertly support and manage gestational diabetes mellitus                                                              | 97 | 4.71(5.0) | 0.43 | ✓ |  |
| Lead pre-conception care and pregnancy planning in women with diabetes or prediabetes                                  | 95 | 4.61(5.0) | 0.52 | ✓ |  |
| Proficiently provide and coordinate ante- and postnatal care related to pre-existing diabetes                          | 95 | 4.63(5.0) | 0.50 | ✓ |  |
| Advocates for quality diabetes care in pregnancy                                                                       | 97 | 4.82(5.0) | 0.31 | ✓ |  |
| Proficiently provides care for healthy growth & development, and health and wellbeing in paediatrics and adolescents   | 97 | 4.66(5.0) | 0.47 | ✓ |  |
| Astute to other issues in paediatrics and youth that impact diabetes care and coordinates care                         | 94 | 4.66(5.0) | 0.47 | ✓ |  |
| Leads transition of care from paediatric to adult clinics                                                              | 95 | 4.71(5.0) | 0.44 | ✓ |  |
| Coordinate and lead complex diabetes impacted by coexisting conditions or circumstances in vulnerable groups           | 95 | 4.68(5.0) | 0.47 | ✓ |  |
| Provide expert advice on the care of people living with diabetes in the acute or in-hospital setting                   | 95 | 4.74(5.0) | 0.42 | ✓ |  |
| Demonstrate expertise in diabetes care in residential-aged-care and end-of-life stages                                 | 97 | 4.82(5.0) | 0.31 | ✓ |  |
| <b>PRACTICE LEVEL 7 - MASTER</b>                                                                                       |    |           |      |   |  |
| Display an advanced expert understanding of the implication of all diabetes type                                       | 97 | 4.82(5.0) | 0.31 | ✓ |  |
| Recognise the complexity of clinical care and responds to high-risk diabetes needs                                     | 97 | 4.84(5.0) | 0.27 | ✓ |  |
| Educate & support others to enable their active participation in care                                                  | 95 | 4.76(5.0) | 0.40 | ✓ |  |
| Demonstrate advanced clinical leadership and management skills                                                         | 95 | 4.76(5.0) | 0.40 | ✓ |  |
| Advocates for, participates in, or leads systems that support safe care, partnerships and professional growth          | 95 | 4.74(5.0) | 0.43 | ✓ |  |
| Integrate and advocates for specialised knowledge to support diabetes care in all vulnerable groups                    | 97 | 4.79(5.0) | 0.34 | ✓ |  |
| Expertly support and manage gestational diabetes mellitus                                                              | 97 | 4.87(5.0) | 0.24 | ✓ |  |
| Lead pre-conception care and pregnancy planning in women with diabetes or prediabetes                                  | 95 | 4.76(5.0) | 0.39 | ✓ |  |
| Proficiently provide and coordinate ante- and postnatal care related to pre-existing diabetes                          | 97 | 4.79(5.0) | 0.34 | ✓ |  |
| Advocates for quality diabetes care in pregnancy                                                                       | 97 | 4.84(5.0) | 0.27 | ✓ |  |
| Proficiently provides care for healthy growth and development, and health and wellbeing in paediatrics and adolescents | 97 | 4.79(5.0) | 0.34 | ✓ |  |
| Astute to other issues in paediatrics and youth that impact diabetes care and coordinates care                         | 97 | 4.74(5.0) | 0.40 | ✓ |  |
| Leads transition of care from paediatric to adult clinics                                                              | 97 | 4.82(5.0) | 0.31 | ✓ |  |
| Coordinate and lead complex diabetes impacted by coexisting conditions or circumstances in vulnerable groups           | 97 | 4.82(5.0) | 0.31 | ✓ |  |
| Provide expert advice on the care of people living with diabetes in the acute or in-hospital setting                   | 95 | 4.79(5.0) | 0.35 | ✓ |  |
| Demonstrate expertise in diabetes care in residential-aged-care and end-of-life stages                                 | 97 | 4.82(5.0) | 0.31 | ✓ |  |

The health professional or health assistant will:

| Build therapeutic relationships                                                                                 |        |            |      |         | Round 1 |            |      |         | Round 2 |            |     |         |
|-----------------------------------------------------------------------------------------------------------------|--------|------------|------|---------|---------|------------|------|---------|---------|------------|-----|---------|
| Capability components                                                                                           | Rank % | Mean (Med) | MAD  | Outcome | Rank %  | Mean (Med) | MAD  | Outcome | Rank %  | Mean (Med) | MAD | Outcome |
| <b>PRACTICE LEVEL 1 - FOUNDATIONAL</b>                                                                          |        |            |      |         |         |            |      |         |         |            |     |         |
| Support the person living with diabetes to identify solutions to improve health                                 | 50     | 3.43(3.5)  | 0.78 | R2      | 50      | 3.42(3.5)  | 0.75 | FG-✓    |         |            |     |         |
| Value and respect diversity                                                                                     | 98     | 4.60(5.0)  | 0.50 | ✓       |         |            |      |         |         |            |     |         |
| Be culturally sensitive                                                                                         | 98     | 4.68(5.0)  | 0.47 | ✓       |         |            |      |         |         |            |     |         |
| <b>PRACTICE LEVEL 2 - PRACTISED</b>                                                                             |        |            |      |         |         |            |      |         |         |            |     |         |
| Acknowledge, understand and respond to the needs of others                                                      | 97     | 4.63(5.0)  | 0.48 | ✓       |         |            |      |         |         |            |     |         |
| Respect the informed health care decision of the person living with diabetes                                    | 100    | 4.71(5.0)  | 0.41 | ✓       |         |            |      |         |         |            |     |         |
| Incorporate cultural and diversity considerations into own practice                                             | 100    | 4.71(5.0)  | 0.41 | ✓       |         |            |      |         |         |            |     |         |
| Understand the importance of self-awareness in caring work                                                      | 100    | 4.63(5.0)  | 0.47 | ✓       |         |            |      |         |         |            |     |         |
| <b>PRACTICE LEVEL 3 – EXPERIENCED</b>                                                                           |        |            |      |         |         |            |      |         |         |            |     |         |
| Recognise the emotions and unmet needs of people living with diabetes                                           | 90     | 4.37(4.0)  | 0.60 | ✓       |         |            |      |         |         |            |     |         |
| Identify and address barriers to engagement                                                                     | 95     | 4.45(4.5)  | 0.55 | ✓       |         |            |      |         |         |            |     |         |
| Promote culture and diversity in health planning                                                                | 97     | 4.63(5.0)  | 0.48 | ✓       |         |            |      |         |         |            |     |         |
| <b>PRACTICE LEVEL 4 – PROFICIENT</b>                                                                            |        |            |      |         |         |            |      |         |         |            |     |         |
| Recognise when there are difficulties engaging with an individual                                               | 97     | 4.71(5.0)  | 0.43 | ✓       |         |            |      |         |         |            |     |         |
| <b>PRACTICE LEVEL 5A – ADVANCED</b>                                                                             |        |            |      |         |         |            |      |         |         |            |     |         |
| Apply advanced strategies to support engagement                                                                 | 97     | 4.53(5.0)  | 0.55 | ✓       |         |            |      |         |         |            |     |         |
| Reflect on and address barriers to engagement                                                                   | 97     | 4.63(5.0)  | 0.48 | ✓       |         |            |      |         |         |            |     |         |
| Responds professionally to the persons' expression of negative emotions                                         | 97     | 4.74(5.0)  | 0.40 | ✓       |         |            |      |         |         |            |     |         |
| Demonstrate self-awareness and caring for oneself                                                               | 97     | 4.68(5.0)  | 0.45 | ✓       |         |            |      |         |         |            |     |         |
| <b>PRACTICE LEVEL 5B – ADVANCED</b>                                                                             |        |            |      |         |         |            |      |         |         |            |     |         |
| Encourage more adaptive behaviours or emotional responses from a person living with diabetes to a given trigger | 95     | 4.55(5.0)  | 0.54 | ✓       |         |            |      |         |         |            |     |         |
| Integrate and mentor in principles of cultural competence and diversity in the organisation                     | 97     | 4.55(5.0)  | 0.54 | ✓       |         |            |      |         |         |            |     |         |
| Incorporate self-awareness as a strategic approach to managing oneself and others                               | 97     | 4.66(5.0)  | 0.47 | ✓       |         |            |      |         |         |            |     |         |
| <b>PRACTICE LEVEL 6 – EXPERT</b>                                                                                |        |            |      |         |         |            |      |         |         |            |     |         |
| Mentor other health professionals in person-centred care                                                        | 95     | 4.68(5.0)  | 0.47 | ✓       |         |            |      |         |         |            |     |         |
| Employ self-awareness for effective leadership                                                                  | 97     | 4.76(5.0)  | 0.37 | ✓       |         |            |      |         |         |            |     |         |
| <b>PRACTICE LEVEL 7 - MASTER</b>                                                                                |        |            |      |         |         |            |      |         |         |            |     |         |
| Promote guidelines and policy to support therapeutic relationships                                              | 95     | 4.79(5.0)  | 0.35 | ✓       |         |            |      |         |         |            |     |         |

The health professional or health assistant will:

| Communicate with influence                                                                 |        |            |      |         | Round 1 |            |      |         | Round 2 |            |     |         |
|--------------------------------------------------------------------------------------------|--------|------------|------|---------|---------|------------|------|---------|---------|------------|-----|---------|
| Capability components                                                                      | Rank % | Mean (Med) | MAD  | Outcome | Rank %  | Mean (Med) | MAD  | Outcome | Rank %  | Mean (Med) | MAD | Outcome |
| <b>PRACTICE LEVEL 1 - FOUNDATIONAL</b>                                                     |        |            |      |         |         |            |      |         |         |            |     |         |
| Support the person living with diabetes to identify solutions to improve health            | 50     | 3.43(3.5)  | 0.78 | R2      | 50      | 3.42(3.5)  | 0.75 | FG-✓    |         |            |     |         |
| Value and respect diversity                                                                | 98     | 4.60(5.0)  | 0.50 | ✓       |         |            |      |         |         |            |     |         |
| Be culturally sensitive                                                                    | 98     | 4.68(5.0)  | 0.47 | ✓       |         |            |      |         |         |            |     |         |
| <b>PRACTICE LEVEL 2 - PRACTISED</b>                                                        |        |            |      |         |         |            |      |         |         |            |     |         |
| Communicate clearly and promote the Diabetes Australia language statement in conversations | 84     | 4.21(4.0)  | 0.62 | ✓       |         |            |      |         |         |            |     |         |

|                                                                                                                              |         |            |      |          |                                         |
|------------------------------------------------------------------------------------------------------------------------------|---------|------------|------|----------|-----------------------------------------|
| Demonstrate effective communication skills, enabling the health professional to listen, understand and adapt to the audience | 97      | 4.63(5.0)  | 0.48 | ✓        |                                         |
| Document precise records to support diabetes care                                                                            | 97      | 4.68(5.0)  | 0.45 | ✓        |                                         |
| Recognise signs of low health literacy and advocate for the persons’ healthcare                                              | 97      | 4.58(5.0)  | 0.51 | ✓        |                                         |
| PRACTICE LEVEL 3 – EXPERIENCED                                                                                               |         |            |      |          |                                         |
| Promote healthy conversations with and for people living with diabetes                                                       | 92      | 4.45(5.0)  | 0.58 | ✓        |                                         |
| Be aware of one’s own thoughts, emotions, communication style an boundaries                                                  | 100     | 4.68(5.0)  | 0.43 | ✓        |                                         |
| Identify and draw attention to important diabetes information to support diabetes care                                       | 92      | 4.34(4.0)  | 0.55 | ✓        |                                         |
| Critically appraise health information sources and discuss with the person living with diabetes                              | 87      | 4.16(4.0)  | 0.49 | ✓        |                                         |
| Communicate with influence and leadership                                                                                    | Round 1 |            |      |          | Round 2                                 |
| Capability components                                                                                                        | Rank %  | Mean (Med) | MAD  | Out come | Rank %<br>Mean (Med)<br>MAD<br>Out come |
| PRACTICE LEVEL 4 – PROFICIENT                                                                                                |         |            |      |          |                                         |
| Engage and commit to healthy conversations with and for people living with diabetes                                          | 95      | 4.71(5.0)  | 0.44 | ✓        |                                         |
| Demonstrates awareness of one’s interaction style & its impact                                                               | 97      | 4.74(5.0)  | 0.40 | ✓        |                                         |
| PRACTICE LEVEL 5A – ADVANCED                                                                                                 |         |            |      |          |                                         |
| Promote a supportive, open and empathic conversation style                                                                   | 97      | 4.71(5.0)  | 0.43 | ✓        |                                         |
| Document precise, succinct and contextual records to support diabetes care                                                   | 97      | 4.79(5.0)  | 0.34 | ✓        |                                         |
| Understand and apply learning principles according to the target audience                                                    | 97      | 4.71(5.0)  | 0.43 | ✓        |                                         |
| PRACTICE LEVEL 5B – ADVANCED                                                                                                 |         |            |      |          |                                         |
| Mentor other health professionals in healthy conversations with and for people living with diabetes                          | 97      | 4.66(5.0)  | 0.47 | ✓        |                                         |
| Advocates for effective communication skills in diabetes care                                                                | 97      | 4.71(5.0)  | 0.43 | ✓        |                                         |
| Mentor others in record-keeping to improve support for diabetes care                                                         | 92      | 4.58(5.0)  | 0.55 | ✓        |                                         |
| PRACTICE LEVEL 6 – EXPERT                                                                                                    |         |            |      |          |                                         |
| Integrate evidenced-based knowledge on strategies to support healthy conversations with and for people living with diabetes  | 97      | 4.87(5.0)  | 0.24 | ✓        |                                         |
| Prepares fact sheets and supportive material in specialty field for diabetes care                                            | 76      | 4.24(4.5)  | 0.76 | ✓        |                                         |
| Lead change and endeavours to improve record-keeping and communications to support diabetes care                             | 95      | 4.63(5.0)  | 0.50 | ✓        |                                         |
| PRACTICE LEVEL 7 - MASTER                                                                                                    |         |            |      |          |                                         |
| Demonstrate excellent communication skills when working with people living with diabetes                                     | 97      | 4.89(5.0)  | 0.19 | ✓        |                                         |
| Influence and negotiates persuasively                                                                                        | 97      | 4.79(5.0)  | 0.34 | ✓        |                                         |
| Inspire and lead with purpose                                                                                                | 97      | 4.76(5.0)  | 0.37 | ✓        |                                         |

The health professional or health assistant will:

| Support counselling to achieve agreed outcomes                              |        |            |      |          | Round 2 |            |      |          |
|-----------------------------------------------------------------------------|--------|------------|------|----------|---------|------------|------|----------|
| Capability components                                                       | Rank % | Mean (Med) | MAD  | Out come | Rank %  | Mean (Med) | MAD  | Out come |
| PRACTICE LEVEL 1 - FOUNDATIONAL                                             |        |            |      |          |         |            |      |          |
| Support implementing a self-management plan                                 | 68     | 3.70(4.0)  | 0.81 | R2       | 64      | 3.72(4.0)  | 0.74 | FG-✓     |
| Identify psychological distress                                             | 83     | 3.95(4.0)  | 0.53 | ✓        |         |            |      |          |
| PRACTICE LEVEL 2 - PRACTISED                                                |        |            |      |          |         |            |      |          |
| Support the person make changes to fit diabetes into their life             | 76     | 4.03(4.0)  | 0.61 | ✓        |         |            |      |          |
| Identify emotional health                                                   | 92     | 4.32(4.0)  | 0.54 | ✓        |         |            |      |          |
| Demonstrate an understanding of psychosocial impact of living with diabetes | 76     | 4.11(4.0)  | 0.61 | ✓        |         |            |      |          |

|                                                                                                                                           |        |            |      |         |         |            |     |         |
|-------------------------------------------------------------------------------------------------------------------------------------------|--------|------------|------|---------|---------|------------|-----|---------|
| PRACTICE LEVEL 3 – EXPERIENCED                                                                                                            |        |            |      |         |         |            |     |         |
| Promote implementation and monitoring of personalised self-management plans                                                               | 82     | 4.32(4.5)  | 0.68 | ✓       |         |            |     |         |
| Incorporate counselling techniques and shared decision-making strategies to achieve outcomes                                              | 82     | 4.21(4.0)  | 0.62 | ✓       |         |            |     |         |
| Monitor for emotional health                                                                                                              | 90     | 4.34(4.0)  | 0.59 | ✓       |         |            |     |         |
| Coordinate care for people with psychosocial impact of living with diabetes                                                               | 82     | 4.24(4.0)  | 0.64 | ✓       |         |            |     |         |
| Advocate for peer support engagement                                                                                                      | 79     | 4.05(4.0)  | 0.50 | ✓       |         |            |     |         |
| Exemplify counselling to achieve agreed outcomes                                                                                          |        |            |      |         | Round 1 |            |     |         |
| Capability components                                                                                                                     | Rank % | Mean (Med) | MAD  | Outcome | Rank %  | Mean (Med) | MAD | Outcome |
| PRACTICE LEVEL 4 – PROFICIENT                                                                                                             |        |            |      |         |         |            |     |         |
| Tailor personalised diabetes self-management plans                                                                                        | 97     | 4.71(5.0)  | 0.43 | ✓       |         |            |     |         |
| Counsel with meaning and shared decision-making                                                                                           | 95     | 4.71(5.0)  | 0.44 | ✓       |         |            |     |         |
| Support connection with peer support groups and services for referral                                                                     | 97     | 4.66(5.0)  | 0.47 | ✓       |         |            |     |         |
| PRACTICE LEVEL 5A – ADVANCED                                                                                                              |        |            |      |         |         |            |     |         |
| Consult in, develop and monitor personalised diabetes self-management plans in partnership with consumer                                  | 97     | 4.66(5.0)  | 0.47 | ✓       |         |            |     |         |
| Determine counselling techniques and shared decision-making to achieve outcomes                                                           | 95     | 4.47(5.0)  | 0.55 | ✓       |         |            |     |         |
| Monitors for eating disorders and disordered eating and refers                                                                            | 87     | 4.26(4.0)  | 0.58 | ✓       |         |            |     |         |
| Coordinate care for people with evidence of psychosocial impact of living with diabetes                                                   | 92     | 4.50(5.0)  | 0.58 | ✓       |         |            |     |         |
| Enable problem-solving by supporting the individual to identify attitudinal and affective factors which impact self-management behaviours | 97     | 4.55(5.0)  | 0.52 | ✓       |         |            |     |         |
| PRACTICE LEVEL 5B – ADVANCED                                                                                                              |        |            |      |         |         |            |     |         |
| Mentor and consult health professionals to support implementing and monitoring personalised self-management plans                         | 95     | 4.53(5.0)  | 0.55 | ✓       |         |            |     |         |
| Mentor other health professionals in counselling techniques                                                                               | 87     | 4.32(4.5)  | 0.68 | ✓       |         |            |     |         |
| Lead care coordination for people with symptoms of psychosocial impact of living with diabetes                                            | 92     | 4.32(4.0)  | 0.61 | ✓       |         |            |     |         |
| PRACTICE LEVEL 6 – EXPERT                                                                                                                 |        |            |      |         |         |            |     |         |
| Integrate guidelines to support the development and quality monitoring of diabetes self-management plans into the organisation            | 97     | 4.68(5.0)  | 0.45 | ✓       |         |            |     |         |
| Incorporate nuances of counselling techniques related to specialty diabetes                                                               | 95     | 4.53(5.0)  | 0.55 | ✓       |         |            |     |         |
| Incorporate measures and pathways for early screening, detection and care of the psychosocial impact of living with diabetes              | 97     | 4.71(5.0)  | 0.43 | ✓       |         |            |     |         |
| PRACTICE LEVEL 7 - MASTER                                                                                                                 |        |            |      |         |         |            |     |         |
| Seamlessly apply shared decision-making approach to management choice                                                                     | 97     | 4.76(5.0)  | 0.37 | ✓       |         |            |     |         |
| Identifies and diagnoses depression and diabetes-related distress in people living with diabetes                                          | 95     | 4.63(5.0)  | 0.50 | ✓       |         |            |     |         |
| Leads endeavours to service delivery to reduce the psychosocial impact of diabetes in people living with diabetes                         | 97     | 4.68(5.0)  | 0.45 | ✓       |         |            |     |         |

|                                                                                                                                                                                                                   |               |                   |            |                 |                |                |                   |            |                 |
|-------------------------------------------------------------------------------------------------------------------------------------------------------------------------------------------------------------------|---------------|-------------------|------------|-----------------|----------------|----------------|-------------------|------------|-----------------|
| <b>PRACTICE LEVEL 2 – PRACTISED</b>                                                                                                                                                                               |               |                   |            |                 |                |                |                   |            |                 |
| Those intending to be involved in the medicine capability should consider their professional scope of practice, the existence of a regulatory framework for escalation of adverse effects and insurance coverage: |               |                   |            |                 |                |                |                   |            |                 |
| Provide a description of <i>Describes</i> basic classes of glucose-lowering medicines available to manage type 2 diabetes                                                                                         | 61            | 3.66(4.0)         | 0.84       | R2              |                | 53             | 3.64(4.0)         | 0.77       | FG--✓*          |
| Identify insulins types and mode of action                                                                                                                                                                        | 68            | 3.92(4.0)         | 0.74       | R2              |                | 70             | 3.89(4.0)         | 0.71       | FG--✓           |
| Identify and manage issues that can impact on quality use of medicines                                                                                                                                            | 74            | 4.08(4.0)         | 0.78       | ✓               |                |                |                   |            |                 |
| Also, when providing care in partnership with people living with diabetes, authorised registered or medication endorsed nurses or pharmacists will:                                                               |               |                   |            |                 |                |                |                   |            |                 |
| Reinforce education for safe administration of injectable glucose-lowering medicines                                                                                                                              | 84            | 4.37(5.0)         | 0.70       | ✓               |                |                |                   |            |                 |
| Consider whether the medicine can be administered safely                                                                                                                                                          | 92            | 4.58(5.0)         | 0.60       | ✓               |                |                |                   |            |                 |
| Promote and incorporate quality use of medicines principles                                                                                                                                                       | 92            | 4.61(5.0)         | 0.56       | ✓               |                |                |                   |            |                 |
| Also, when providing care in partnership with people living with diabetes authorised registered or medication endorsed nurses will:                                                                               |               |                   |            |                 |                |                |                   |            |                 |
| Administer glucose-lowering medicines safely                                                                                                                                                                      | 90            | 4.45(5.0)         | 0.70       | ✓               |                |                |                   |            |                 |
| <b>PRACTICE LEVEL 3 – EXPERIENCED</b>                                                                                                                                                                             |               |                   |            |                 |                |                |                   |            |                 |
| <del>Explain</del> <i>Recognise</i> the action of all glucose-lowering medicines available to manage type 2 diabetes                                                                                              | 71            | 3.87(4.0)         | 0.66       | R2              |                | 59             | 3.75(4.0)         | 0.66       | FG--✓*          |
| Promote therapeutic use of glucose-lowering medicines available to manage type 2 diabetes                                                                                                                         | 74            | 4.03(4.0)         | 0.72       | ✓               |                |                |                   |            |                 |
| Demonstrate understanding of insulins types and mode of action                                                                                                                                                    | 74            | 4.03(4.0)         | 0.67       | ✓               |                |                |                   |            |                 |
| Monitor issues that can impact on use of medicines and evaluates responses                                                                                                                                        | 76            | 4.11(4.0)         | 0.71       | ✓               |                |                |                   |            |                 |
| When delivering care to people living with diabetes, all authorised registered or medication endorsed nurses, pharmacists and Diabete Aboriginal and Torres Strait Islander Health Practitioner or Worker will:   |               |                   |            |                 |                |                |                   |            |                 |
| • Educate the person living with diabetes or relevant others in injection technique                                                                                                                               | 79            | 4.26(4.0)         | 0.70       | ✓               |                |                |                   |            |                 |
| In addition, when providing care in partnership with people living with diabetes, all registered or medication endorsed nurses or pharmacists, endorsed by their organisation will:                               |               |                   |            |                 |                |                |                   |            |                 |
| • Reduce medicines risk in people living with diabetes                                                                                                                                                            | 92            | 4.34(4.0)         | 0.55       | ✓               |                |                |                   |            |                 |
| <b>Exemplify quality use of medicines</b>                                                                                                                                                                         |               |                   |            |                 |                |                |                   |            |                 |
|                                                                                                                                                                                                                   |               |                   |            |                 | <b>Round 1</b> | <b>Round 2</b> |                   |            |                 |
| <b>Capability components</b>                                                                                                                                                                                      | <b>Rank %</b> | <b>Mean (Med)</b> | <b>MAD</b> | <b>Out come</b> |                | <b>Rank %</b>  | <b>Mean (Med)</b> | <b>MAD</b> | <b>Out come</b> |
| <b>PRACTICE LEVEL 4 – PROFICIENT</b>                                                                                                                                                                              |               |                   |            |                 |                |                |                   |            |                 |
| Those intending to be involved in the medicine capability should consider their professional scope of practice, the existence of a regulatory framework for escalation of adverse effects and insurance coverage: |               |                   |            |                 |                |                |                   |            |                 |
| Understand combinations of glucose-lowering medicines available to manage type 2 diabetes and reduce the risk of adverse effects                                                                                  | 97            | 4.79(5.0)         | 0.34       | ✓               |                |                |                   |            |                 |
| Demonstrate an understanding of insulins regimens to achieve individualised goals                                                                                                                                 | 97            | 4.76(5.0)         | 0.37       | ✓               |                |                |                   |            |                 |
| Promote safe and effective handling and administration of diabetes medicines                                                                                                                                      | 97            | 4.82(5.0)         | 0.31       | ✓               |                |                |                   |            |                 |
| <b>PRACTICE LEVEL 5A – ADVANCED</b>                                                                                                                                                                               |               |                   |            |                 |                |                |                   |            |                 |
| Support education in and appropriate choice of glucose-lowering medicine for pharmacotherapeutics management of type 2 diabetes                                                                                   | 97            | 4.68(5.0)         | 0.45       | ✓               |                |                |                   |            |                 |
| Support quality use of insulin to manage diabetes                                                                                                                                                                 | 97            | 4.71(5.0)         | 0.43       | ✓               |                |                |                   |            |                 |
| Understand the place for complementary and alternative medicines in diabetes                                                                                                                                      | 79            | 4.18(4.0)         | 0.69       | ✓               |                |                |                   |            |                 |

|                                                                                                                                                                                          |    |           |      |   |  |
|------------------------------------------------------------------------------------------------------------------------------------------------------------------------------------------|----|-----------|------|---|--|
| <b>PRACTICE LEVEL 5B – ADVANCED</b>                                                                                                                                                      |    |           |      |   |  |
| Incorporate quality use of medicines principles into decision-making                                                                                                                     | 95 | 4.82(5.0) | 0.32 | ✓ |  |
| Promote therapeutic use and monitor the impact of glucose-lowering medicines available to manage type 2 diabetes to ensure safe and effective use                                        | 97 | 4.87(5.0) | 0.24 | ✓ |  |
| Optimise insulin therapy in people living with diabetes                                                                                                                                  | 92 | 4.74(5.0) | 0.43 | ✓ |  |
| <b>PRACTICE LEVEL 6 – EXPERT</b>                                                                                                                                                         |    |           |      |   |  |
| Monitor for the therapeutic use of glucose-lowering medicines available to manage type 2 diabetes                                                                                        | 95 | 4.84(5.0) | 0.28 | ✓ |  |
| Monitor for and promote the therapeutic use of insulin to manage type 1 diabetes                                                                                                         | 95 | 4.87(5.0) | 0.24 | ✓ |  |
| Promote optimisation of diabetes to target through development of novel tools or aides to support management and care                                                                    | 95 | 4.68(5.0) | 0.47 | ✓ |  |
| <b>PRACTICE LEVEL 7 - MASTER</b>                                                                                                                                                         |    |           |      |   |  |
| When involved in medicine management while caring for people living with diabetes, the advanced practice CDE who is a 'non-medical prescriber' considering their scope of practice will: | 97 | 4.84(5.0) | 0.27 | ✓ |  |
| Demonstrate proficiency in quality use of medicines                                                                                                                                      |    |           |      |   |  |
| Meet the National Prescribing Service competencies required to prescribe medicines                                                                                                       | 97 | 4.84(5.0) | 0.27 | ✓ |  |
| Adeptly choose and prescribe suitable medicines within a defined scope of practice for diabetes care                                                                                     | 97 | 4.84(5.0) | 0.27 | ✓ |  |
| Monitor prescribed medicines to optimise diabetes care                                                                                                                                   | 97 | 4.84(5.0) | 0.27 | ✓ |  |
| When involved in medicine management while caring for people with diabetes, the diabetes nurse practitioner will:                                                                        |    |           |      |   |  |
| Demonstrate an adept understanding of the quality use of medicines principles                                                                                                            | 98 | 4.87(5.0) | 0.24 | ✓ |  |
| Proficiently use diabetes and metabolic medicines safely and effectively                                                                                                                 | 95 | 4.82(5.0) | 0.32 | ✓ |  |
| Optimise medicine therapy and minimise drug-related problems                                                                                                                             | 97 | 4.82(5.0) | 0.31 | ✓ |  |
| Monitor the impact of polypharmacy                                                                                                                                                       | 97 | 4.76(5.0) | 0.37 | ✓ |  |

The health professional or health assistant will:

| Display awareness of diabetes technology                                                                                           | Round 1 |            |      |              | Round 2 |            |      |         |
|------------------------------------------------------------------------------------------------------------------------------------|---------|------------|------|--------------|---------|------------|------|---------|
|                                                                                                                                    | Rank %  | Mean (Med) | MAD  | Outcome      | Rank %  | Mean (Med) | MAD  | Outcome |
| <b>PRACTICE LEVEL 1 - FOUNDATIONAL</b>                                                                                             |         |            |      |              |         |            |      |         |
| Display basic blood glucose and ketone monitoring skills                                                                           | 70      | 3.98(4.0)  | 0.84 | R2           | 78      | 3.94(4.0)  | 0.70 | ✓       |
| Recognise technologies used to manage diabetes                                                                                     | 40      | 3.25(3.0)  | 0.90 | R2           | 39      | 3.19(3.0)  | 0.96 | x       |
| Be aware of and report basic issues that could impact insulin pump, CGM and Flash Glucose Monitoring technology                    | 38      | 3.20(3.0)  | 0.90 | x            |         |            |      |         |
| <b>PRACTICE LEVEL 2 - PRACTISED</b>                                                                                                |         |            |      |              |         |            |      |         |
| Demonstrate blood glucose and ketone monitoring skills                                                                             | 90      | 4.53(5.0)  | 0.62 | ✓            |         |            |      |         |
| Show understanding Recognise technologies used to manage type 1 diabetes                                                           | 42      | 3.37(3.0)  | 0.74 | R2           | 47      | 3.42(3.0)  | 0.69 | FG*-✓*  |
| Recognise potential basic-fundamental problems with insulin pump, or Continuous Glucose or Flash Glucose Monitoring sensor use     | 42      | 3.26(3.0)  | 0.78 | R2           | 45      | 3.31(3.0)  | 0.84 | FG*-✓*  |
| <b>PRACTICE LEVEL 3 – EXPERIENCED</b>                                                                                              |         |            |      |              |         |            |      |         |
| Demonstrate proficiency at blood glucose and ketone monitoring                                                                     | 90      | 4.45(5.0)  | 0.61 | ✓            |         |            |      |         |
| Display awareness of technologies used to manage diabetes                                                                          | 68      | 3.89(4.0)  | 0.62 | R2           | 67      | 3.80(4.0)  | 0.61 | FG -✓   |
| Encourage the consumer to apply problem-solving skills for insulin pump, Continuous Glucose or Flash Glucose Monitoring sensor use | 45      | 3.45(3.0)  | 0.86 | R2<br>EAG Ad | 50      | 3.43(4.0)  | 0.86 | FG -✓*  |



|                                                                                                                                                       |                |                   |            |                 |                |                   |            |                 |
|-------------------------------------------------------------------------------------------------------------------------------------------------------|----------------|-------------------|------------|-----------------|----------------|-------------------|------------|-----------------|
| Advocate for the use of diabetes technology in <del>Aboriginal and Torres Strait Islander people</del> individuals with diabetes                      | 55             | 3.63(4.0)         | 0.83       | R2              | 61             | 3.72(4.0)         | 0.74       | FG-✓*           |
| <b>PRACTICE LEVEL 4 – PROFICIENT</b>                                                                                                                  |                |                   |            |                 |                |                   |            |                 |
| Demonstrate adept skills in blood glucose and ketone monitoring                                                                                       | 97             | 4.79(5.0)         | 0.34       | ✓               |                |                   |            |                 |
| Support the use of diabetes technologies to manage diabetes                                                                                           | 92             | 4.53(5.0)         | 0.60       | ✓               |                |                   |            |                 |
| Promote problem-solving skills for insulin pump, Continuous or Flash Glucose Monitoring sensor use                                                    | 84             | 4.26(4.0)         | 0.70       | ✓               |                |                   |            |                 |
| <b>Exemplify quality use of diabetes technology</b>                                                                                                   | <b>Round 1</b> |                   |            |                 | <b>Round 2</b> |                   |            |                 |
| <b>Capability components</b>                                                                                                                          | <b>Rank %</b>  | <b>Mean (Med)</b> | <b>MAD</b> | <b>Out come</b> | <b>Rank %</b>  | <b>Mean (Med)</b> | <b>MAD</b> | <b>Out come</b> |
| <b>PRACTICE LEVEL 5A – ADVANCED</b>                                                                                                                   |                |                   |            |                 |                |                   |            |                 |
| Adeptly promote blood glucose and ketone monitoring and assessing blood glucose variability                                                           | 97             | 4.79(5.0)         | 0.34       | ✓               |                |                   |            |                 |
| Capable of accessing and reviewing ambulatory glucose profiles (AGP)                                                                                  | 95             | 4.47(5.0)         | 0.55       | ✓               |                |                   |            |                 |
| Aid with diabetes technologies to manage diabetes                                                                                                     | 97             | 4.45(4.0)         | 0.52       | ✓               |                |                   |            |                 |
| Apply problem-solving skills for Continuous and Flash Glucose Monitoring sensor, and insulin pump use                                                 | 90             | 4.29(4.0)         | 0.56       | ✓               |                |                   |            |                 |
| <b>PRACTICE LEVEL 5B – ADVANCED</b>                                                                                                                   |                |                   |            |                 |                |                   |            |                 |
| Proficiently educate in and commence Flash and Continuous Glucose Monitoring systems                                                                  | 95             | 4.66(5.0)         | 0.49       | ✓               |                |                   |            |                 |
| Comprehend ambulatory glucose profiles and, reviews and analyses Continuous or Flash Glucose Monitoring reports                                       | 95             | 4.63(5.0)         | 0.50       | ✓               |                |                   |            |                 |
| Competently educate, commence and monitor Insulin Pump Therapy                                                                                        | 79             | 4.11(4.0)         | 0.71       | ✓               |                |                   |            |                 |
| <b>PRACTICE LEVEL 6 – EXPERT</b>                                                                                                                      |                |                   |            |                 |                |                   |            |                 |
| Demonstrate knowledge of contemporary diabetes technological advances                                                                                 | 97             | 4.71(5.0)         | 0.43       | ✓               |                |                   |            |                 |
| Comprehensively explain the processes & logistics required to commence a person living with diabetes on an insulin pump                               | 92             | 4.61(5.0)         | 0.54       | ✓               |                |                   |            |                 |
| Adeptly train a person living with type 1 diabetes regarding insulin pump therapy                                                                     | 90             | 4.50(5.0)         | 0.61       | ✓               |                |                   |            |                 |
| Adeptly monitor insulin pump therapy, Continuous and Flash Glucose Monitoring, and interpret ambulatory glucose profiles and reports                  | 97             | 4.68(5.0)         | 0.45       | ✓               |                |                   |            |                 |
| Proficiently provide advice to people using insulin pump therapy to optimise care                                                                     | 97             | 4.66(5.0)         | 0.47       | ✓               |                |                   |            |                 |
| <b>PRACTICE LEVEL 7 - MASTER</b>                                                                                                                      |                |                   |            |                 |                |                   |            |                 |
| Be adept at interpreting ambulatory glucose profiles, and differing Continuous or Flash Glucose Monitoring and pump reports to optimise diabetes care | 97             | 4.79(5.0)         | 0.34       | ✓               |                |                   |            |                 |
| Apply comprehensive advanced skills to manage a person living with diabetes using insulin pump therapy                                                | 92             | 4.74(5.0)         | 0.43       | ✓               |                |                   |            |                 |

The health professional or health assistant will:

|                                                             |                |                   |            |                 |                |                   |            |                 |
|-------------------------------------------------------------|----------------|-------------------|------------|-----------------|----------------|-------------------|------------|-----------------|
| <b>Support care coordination</b>                            | <b>Round 1</b> |                   |            |                 | <b>Round 2</b> |                   |            |                 |
| <b>Capability components</b>                                | <b>Rank %</b>  | <b>Mean (Med)</b> | <b>MAD</b> | <b>Out come</b> | <b>Rank %</b>  | <b>Mean (Med)</b> | <b>MAD</b> | <b>Out come</b> |
| <b>PRACTICE LEVEL 1 - FOUNDATIONAL</b>                      |                |                   |            |                 |                |                   |            |                 |
| Identify internal and external relationships                | 65             | 3.73(4.0)         | 0.61       | R2              | 64             | 3.83(4.0)         | 0.88       | FG-✓            |
| Listen to and understand the needs of others                | 90             | 4.35(4.0)         | 0.59       | ✓               |                |                   |            |                 |
| Share learnings and support others                          | 83             | 4.13(4.0)         | 0.53       | ✓               |                |                   |            |                 |
| <b>PRACTICE LEVEL 2 - PRACTISED</b>                         |                |                   |            |                 |                |                   |            |                 |
| Maintain accurate and confidential records of clinical care | 100            | 4.89(5.0)         | 0.19       | ✓               |                |                   |            |                 |
| Engage in care coordination                                 | 97             | 4.68(5.0)         | 0.45       | ✓               |                |                   |            |                 |



|                                                                                 |                |                   |            |                 |                                                                     |
|---------------------------------------------------------------------------------|----------------|-------------------|------------|-----------------|---------------------------------------------------------------------|
| Listen to, understand and recognise the needs of others                         | 100            | 4.82(5.0)         | 0.30       | ✓               |                                                                     |
| Share learning and supports others                                              | 100            | 4.71(5.0)         | 0.41       | ✓               |                                                                     |
| <b>PRACTICE LEVEL 3 – EXPERIENCED</b>                                           |                |                   |            |                 |                                                                     |
| Support seamless transition through quality record keeping                      | 92             | 4.63(5.0)         | 0.62       | ✓               |                                                                     |
| Develop care plans and manage care coordination                                 | 87             | 4.34(4.0)         | 0.62       | ✓               |                                                                     |
| Nurture relevant external relationships conducive to care of chronic conditions | 90             | 4.61(5.0)         | 0.56       | ✓               |                                                                     |
| Share learning and support others                                               | 92             | 4.45(5.0)         | 0.58       | ✓               |                                                                     |
| <b>Lead care coordination</b>                                                   | <b>Round 1</b> |                   |            |                 | <b>Round 2</b>                                                      |
| <b>Capability components</b>                                                    | <b>Rank %</b>  | <b>Mean (Med)</b> | <b>MAD</b> | <b>Out come</b> | <b>Rank %</b><br><b>Mean (Med)</b><br><b>MAD</b><br><b>Out come</b> |
| <b>PRACTICE LEVEL 4 – PROFICIENT</b>                                            |                |                   |            |                 |                                                                     |
| Engage in care coordination                                                     | 95             | 4.55(5.0)         | 0.54       | ✓               |                                                                     |
| Participate as an active member of the interdisciplinary team                   | 97             | 4.79(5.0)         | 0.34       | ✓               |                                                                     |
| <b>PRACTICE LEVEL 5A – ADVANCED</b>                                             |                |                   |            |                 |                                                                     |
| Implement activities and processes that facilitate care coordination            | 97             | 4.68(5.0)         | 0.45       | ✓               |                                                                     |
| Promote and engage in interdisciplinary collaborative practice                  | 97             | 4.74(5.0)         | 0.40       | ✓               |                                                                     |
| <b>PRACTICE LEVEL 5B – ADVANCED</b>                                             |                |                   |            |                 |                                                                     |
| Apply broad clinical and systems approach to improve care coordination          | 92             | 4.58(5.0)         | 0.55       | ✓               |                                                                     |
| Cultivate an environment of collaborative practice and acts as a role model     | 95             | 4.71(5.0)         | 0.44       | ✓               |                                                                     |
| <b>PRACTICE LEVEL 6 – EXPERT</b>                                                |                |                   |            |                 |                                                                     |
| Expertly tailors care plans and care coordination                               | 97             | 4.71(5.0)         | 0.43       | ✓               |                                                                     |
| Establish a culture of collaboratively interdisciplinary practice               | 97             | 4.84(5.0)         | 0.27       | ✓               |                                                                     |
| Identify barriers and solutions to care coordination in the specialty area      | 97             | 4.79(5.0)         | 0.34       | ✓               |                                                                     |
| <b>PRACTICE LEVEL 7 - MASTER</b>                                                |                |                   |            |                 |                                                                     |
| Mentor in care coordination, contribute to planning and policy                  | 94             | 4.66(5.0)         | 0.49       | ✓               |                                                                     |
| Exemplify care coordination and interdisciplinary collaboration                 | 97             | 4.82(5.0)         | 0.31       | ✓               |                                                                     |

The health professional or health assistant will:

|                                                                                                      |                |                   |            |                 |                |                   |            |                 |
|------------------------------------------------------------------------------------------------------|----------------|-------------------|------------|-----------------|----------------|-------------------|------------|-----------------|
| <b>Achieve quality</b>                                                                               | <b>Round 1</b> |                   |            |                 | <b>Round 2</b> |                   |            |                 |
| <b>Capability components</b>                                                                         | <b>Rank %</b>  | <b>Mean (Med)</b> | <b>MAD</b> | <b>Out come</b> | <b>Rank %</b>  | <b>Mean (Med)</b> | <b>MAD</b> | <b>Out come</b> |
| <b>PRACTICE LEVEL 1 - FOUNDATIONAL</b>                                                               |                |                   |            |                 |                |                   |            |                 |
| Support quality improvement                                                                          | 78             | 3.95(4.0)         | 0.68       | ✓               |                |                   |            |                 |
| <b>PRACTICE LEVEL 2 - PRACTISED</b>                                                                  |                |                   |            |                 |                |                   |            |                 |
| Engage in quality improvement                                                                        | 92             | 4.53(5.0)         | 0.57       | ✓               |                |                   |            |                 |
| Responsive to change                                                                                 | 97             | 4.58(5.0)         | 0.51       | ✓               |                |                   |            |                 |
| <b>PRACTICE LEVEL 3 – EXPERIENCED</b>                                                                |                |                   |            |                 |                |                   |            |                 |
| Seek and critically review publications related to diabetes education and care <i>to inform care</i> | 63             | 3.89(4.0)         | 0.71       | R2              | 44             | 3.35(3.0)         | 0.94       | FG*-✓*          |
| Engage in quality improvement                                                                        | 90             | 4.42(5.0)         | 0.61       | ✓               |                |                   |            |                 |
| Responsive to change                                                                                 | 90             | 4.47(5.0)         | 0.61       | ✓               |                |                   |            |                 |
| <b>Cultivate quality through leadership and research</b>                                             | <b>Round 1</b> |                   |            |                 | <b>Round 2</b> |                   |            |                 |
| <b>Capability components</b>                                                                         | <b>Rank %</b>  | <b>Mean (Med)</b> | <b>MAD</b> | <b>Out come</b> | <b>Rank %</b>  | <b>Mean (Med)</b> | <b>MAD</b> | <b>Out come</b> |
| <b>PRACTICE LEVEL 4 – PROFICIENT</b>                                                                 |                |                   |            |                 |                |                   |            |                 |
| Identify relevant evidence-base to guide practice                                                    | 97             | 4.74(5.0)         | 0.40       | ✓               |                |                   |            |                 |
| Engage in quality improvement                                                                        | 97             | 4.71(5.0)         | 0.43       | ✓               |                |                   |            |                 |
| Responsive to change                                                                                 | 97             | 4.79(5.0)         | 0.34       | ✓               |                |                   |            |                 |

|                                                                                                                                                                 |    |           |      |   |  |
|-----------------------------------------------------------------------------------------------------------------------------------------------------------------|----|-----------|------|---|--|
| <b>PRACTICE LEVEL 5A – ADVANCED</b>                                                                                                                             |    |           |      |   |  |
| Support research and quality improvement to build the evidence to promote improvements in self-management of prediabetes and diabetes education and care        | 95 | 4.45(4.5) | 0.55 | ✓ |  |
| <b>PRACTICE LEVEL 5B – ADVANCED</b>                                                                                                                             |    |           |      |   |  |
| Develop a culture of quality improvement                                                                                                                        | 97 | 4.74(5.0) | 0.40 | ✓ |  |
| Participate in research and quality improvement to build the evidence to promote improvements in self-management of prediabetes and diabetes education and care | 95 | 4.58(5.0) | 0.53 | ✓ |  |
| Embrace change towards improvements in diabetes care                                                                                                            | 97 | 4.82(5.0) | 0.31 | ✓ |  |
| <b>PRACTICE LEVEL 6 – EXPERT</b>                                                                                                                                |    |           |      |   |  |
| Cultivate a culture of continuous improvement                                                                                                                   | 97 | 4.87(5.0) | 0.24 | ✓ |  |
| Influence research and quality improvement to build the evidence base to improve lives of people living with diabetes and prediabetes                           | 95 | 4.71(5.0) | 0.44 | ✓ |  |
| <b>PRACTICE LEVEL 7 - MASTER</b>                                                                                                                                |    |           |      |   |  |
| Apply research proficiently into advanced practice                                                                                                              | 95 | 4.71(5.0) | 0.44 | ✓ |  |
| Demonstrate a commitment to lifelong learning                                                                                                                   | 97 | 4.79(5.0) | 0.34 | ✓ |  |
| Lead research and drive innovation                                                                                                                              | 94 | 4.55(5.0) | 0.59 | ✓ |  |

#### Consensus Outcome Scale:

✓ = accepted

R2 = carried over to Round 2 for ranking

X = rejected

FG = sent to focus group

FG \* = sent to focus group on advice of the Expert Advisory Group

FG-X = rejected by focus group

✓ \* = accepted by focus group with amendment as marked in italics/strikethrough

FG-Add = additional capability component added by focus group

#### Level of Agreement:

High =

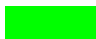

Moderate =

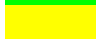

Low =

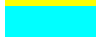

**Table S7: Minimum level of clinical competence in diabetes care required by roles**

| Practice Level 1                                                                                                                                                                                                                                                                                                           | Practice Level 2                                                                                                                                                                                                                                                | Practice Level 3                                                                                                                                                    | Practice Level 4                                                                                                                                                          | Practice Level 5                                                                                                                                  | Practice Level 6                                                                                                        | Practice Level 7                                                                     |
|----------------------------------------------------------------------------------------------------------------------------------------------------------------------------------------------------------------------------------------------------------------------------------------------------------------------------|-----------------------------------------------------------------------------------------------------------------------------------------------------------------------------------------------------------------------------------------------------------------|---------------------------------------------------------------------------------------------------------------------------------------------------------------------|---------------------------------------------------------------------------------------------------------------------------------------------------------------------------|---------------------------------------------------------------------------------------------------------------------------------------------------|-------------------------------------------------------------------------------------------------------------------------|--------------------------------------------------------------------------------------|
| <b>Foundational</b><br>Certificate II or III                                                                                                                                                                                                                                                                               | <b>Practised</b><br>Undergraduate degree<br>Advanced Diploma<br>Certificate IV                                                                                                                                                                                  | <b>Experienced</b><br>Bachelor degree                                                                                                                               | <b>Proficient</b><br>Bachelor degree ± PGC<br>Certificate IV + PGC                                                                                                        | <b>Advanced</b><br>Bachelor degree + PGC                                                                                                          | <b>Expert</b><br>Bachelor degree + PGD                                                                                  | <b>Master</b><br>Bachelor degree + PGD ± Masters Masters                             |
| <ul style="list-style-type: none"> <li>• Assistant in Nursing</li> <li>• Personal Care Assistant</li> <li>• Allied Health Assistant</li> <li>• Personal Carer</li> <li>• Health Care Assistant</li> <li>• Pharmacy Assistant</li> <li>• Aboriginal and Torres Strait Islander Health Practitioner <sup>PT</sup></li> </ul> | <ul style="list-style-type: none"> <li>• Generalist nurse</li> <li>• Generalist AHP</li> <li>• Midwife <sup>PT</sup></li> <li>• Enrolled Nurse</li> <li>• Aboriginal and Torres Strait Islander Health Practitioner <sup>PT</sup> (AHPRA registered)</li> </ul> | <ul style="list-style-type: none"> <li>• Primary healthcare nurse</li> <li>• Practice Nurse</li> <li>• Primary healthcare AHP</li> <li>• Community Nurse</li> </ul> | <ul style="list-style-type: none"> <li>• Diabetes Educator (Nurse or AHP)</li> <li>• Aboriginal and Torres Strait Islander <b>Diabetes</b> Health Practitioner</li> </ul> | <ul style="list-style-type: none"> <li>• Credentialled Diabetes Educator <sup>TM</sup> [*Novice (5A)-*Experienced (5B)] – Nurse or AHP</li> </ul> | <ul style="list-style-type: none"> <li>• Specialist Credentialled Diabetes Educator [*Expert] – Nurse or AHP</li> </ul> | <ul style="list-style-type: none"> <li>• Nurse Practitioner <sup>PT</sup></li> </ul> |
| <p>*Aligned with ADEA 3 levels of competence for a CDE<br/># Does not constitute a title but is a descriptor</p> <p>PGD=Postgraduate diploma<br/>PGC=Postgraduate certificate</p>                                                                                                                                          |                                                                                                                                                                                                                                                                 |                                                                                                                                                                     |                                                                                                                                                                           |                                                                                                                                                   |                                                                                                                         |                                                                                      |

NB: Advanced Management Credentialled Diabetes Educator with non-medical prescriber endorsement recommended and thought to sit in practice level 6 or 7.
